# Supplementary material for: Single-Atom Tungsten Doped Nis0.5Se0.5 Nanosheets@Nanorods Heterostructures Catalyze Water Splitting Highly Active and Durable
Source: Research Square preprint supplement (doi:10.21203/rs.3.rs-681994/v1), 2021-07-13
Supplement: Supplementary file 1 [file f0dd279ea7003fb93d19ed87.pdf]

- 1 **Supporting information**
- 2 **Single-Atom Tungsten Doped Ni<sub>0.5</sub>Se<sub>0.5</sub> Nanosheets@Nanorods Heterostructures**
- 3 **Catalyze Water Splitting Highly Active and Durable**

#### 4 **Experimental Section**

5 Selenium powder (Se, 99.999%), thiourea (CN<sub>2</sub>H<sub>4</sub>S, 99.0%), tungsten trioxide (WO<sub>3</sub>,  
6 98%), hydrazine hydrate (N<sub>2</sub>H<sub>4</sub>·H<sub>2</sub>O, 80%), ammonium fluoride (NH<sub>4</sub>F, 98.0%),  
7 Nickel sulfide (NiS, 99.9%), Nickel selenide (NiSe, 99.9%), tungsten Sulfide (WS<sub>2</sub>,  
8 99.9%), tungsten Selenide (WSe<sub>2</sub>, 99.9%), Potassium hydroxide (KOH, 90%) and 5  
9 wt.% Nafion solution were all purchased from Adamas Chemical Reagent Co. Ltd.  
10 Ethanol (CH<sub>3</sub>CH<sub>2</sub>OH, ≥ 99.8%), acetone (CH<sub>3</sub>COCH<sub>3</sub>, ≥ 99.5%), and isopropyl  
11 alcohol (C<sub>3</sub>H<sub>8</sub>O, ≥ 99.8%), hydrochloric acid (HCl, 37%) were purchased from  
12 Kermel (Tianjin, China). All chemicals were used as received without further  
13 purification. The deionized (DI) water was produced by an ultrapure water system  
14 (Millipore).

#### 15 *Synthesis of W-NiS.*

16 To synthesize W-NiS, the same condition as mentioned above except no selenium  
17 powder in the W-NiS<sub>0.5</sub>Se<sub>0.5</sub> prepared process.

#### 18 *Synthesis of W-NiSe.*

19 To synthesize W-NiSe, the same condition as mentioned above except no thiourea  
20 powder in the W-NiS<sub>0.5</sub>Se<sub>0.5</sub> prepared process.

#### 21 *Synthesis of NiS<sub>0.5</sub>Se<sub>0.5</sub>.*

22 In a typical synthesis of the NiS<sub>0.5</sub>Se<sub>0.5</sub>, to remove the nickel oxides on the NF surface,  
23 the NF was soaked in 1 M HCl solution firstly, then washed with DI water, acetone  
24 and ethanol in turns. The NF was dried in a vacuum oven to avoid reoxidation. In  
25 detail, 0.288 g selenium powder was firstly dissolved in 6 ml hydrazine hydrate and

then added 0.278 g thiourea and 0.4 g ammonium fluoride. At last, 15 ml ethanol and 9 ml water were added. After stirring for 0.5 h, the obtained solution with a dried NF (1 x 2.5 cm<sup>2</sup>) was put into a 50 ml Teflon-lined stainless autoclave to process the solvothermal reaction at 200 °C for 20 h. After cooling to the room temperature, the obtained NiS<sub>0.5</sub>Se<sub>0.5</sub> nanorod@nanosheet hybrid (NiS<sub>0.5</sub>Se<sub>0.5</sub>) was washed with DI water for three times then frozen drying. To convert the above sample to the corresponding NiS<sub>x</sub>Se<sub>1-x</sub>, changing the relevant S: Se molar ratio<sup>1</sup>.

### ***Synthesis of NiS.***

To synthesize NiS, the same condition as mentioned above except no selenium powder in the NiS<sub>0.5</sub>Se<sub>0.5</sub> prepared process.

### ***Synthesis of NiSe.***

To synthesize NiSe, the same condition as mentioned above except no thiourea powder in the NiS<sub>0.5</sub>Se<sub>0.5</sub> prepared process.

### **Calculation of e<sub>g</sub> filling.**

The temperature-dependent magnetizations (M-T) for the prepared samples were performed under H = 1 kOe. The total effective magnetic moment (μ<sub>eff</sub>) can be obtained by μ<sub>eff</sub> = √8C μ<sub>B</sub> through χ<sup>-1</sup>-T liner fitting result, in which C is Curie constant and obtained from the magnetizations (χ = M/H) above 150 K according to Curie–Weiss law<sup>2</sup>.

For Ni ions, μ<sub>eff</sub> can also be calculated from the relationship<sup>3</sup>:

$$\mu_{\text{eff}} = g\mu_B \sqrt{S_{LS}(S_{LS} + 1)V_{LS} + S_r(S_{HS} + 1)V_{HS}}$$

where g is g factor, S<sub>LS</sub>(=0) and S<sub>HS</sub>(=2) are the S value, and V<sub>LS</sub> and V<sub>HS</sub>(=1-V<sub>LS</sub>) are

the volume fractions for  $\text{Ni}^{2+}$  ions. Therefore, using above two values, the  $e_g$  electron (x) can be further calculated by  $x = S_{\text{LS}} * V_{\text{LS}} + S_{\text{HS}} * V_{\text{HS}}$ .

#### Calculation of turnover frequencies (TOFs)

The TOFs per metal site were calculated according to the hypothesis that all metal atoms (W and Ni) of the nanomaterials served as active sites and contacted with the electrolyte. The following formula was applied to calculate the turnover frequency (TOFs) per active site in  $\text{NiS}_{0.5}\text{Se}_{0.5}$ <sup>4</sup>:

$$TOFs = \frac{\# \text{ total hydrogen turnover /cm}^2 \text{ geomrtric aera}}{\# \text{ active sites /cm}^2 \text{ geomrtric aera}}$$

$$TOFs = \frac{\# \text{ total oxygen turnover /cm}^2 \text{ geomrtric aera}}{\# \text{ active sites /cm}^2 \text{ geomrtric aera}}$$

In addition, the calculated TOFs for W- $\text{NiS}_{0.5}\text{Se}_{0.5}$  require another equation<sup>5</sup>:

$$TOFs_{\text{cal}} = TOFs_{\text{Ni}}X_{\text{Ni}} + TOFs_{\text{W}}(1 - X_{\text{Ni}})$$

$$X_{\text{Ni}} = \frac{\text{number of active Ni atoms (mol)}}{\text{total number of active Ni and W atoms (mol)}}$$

According to the above mentioned hypothesis, all the active sites were accessible to the electrolyte. Therefore, in the practical condition, it is needed to note that the number of practical active sites are considered to be lower than the theoretical value.

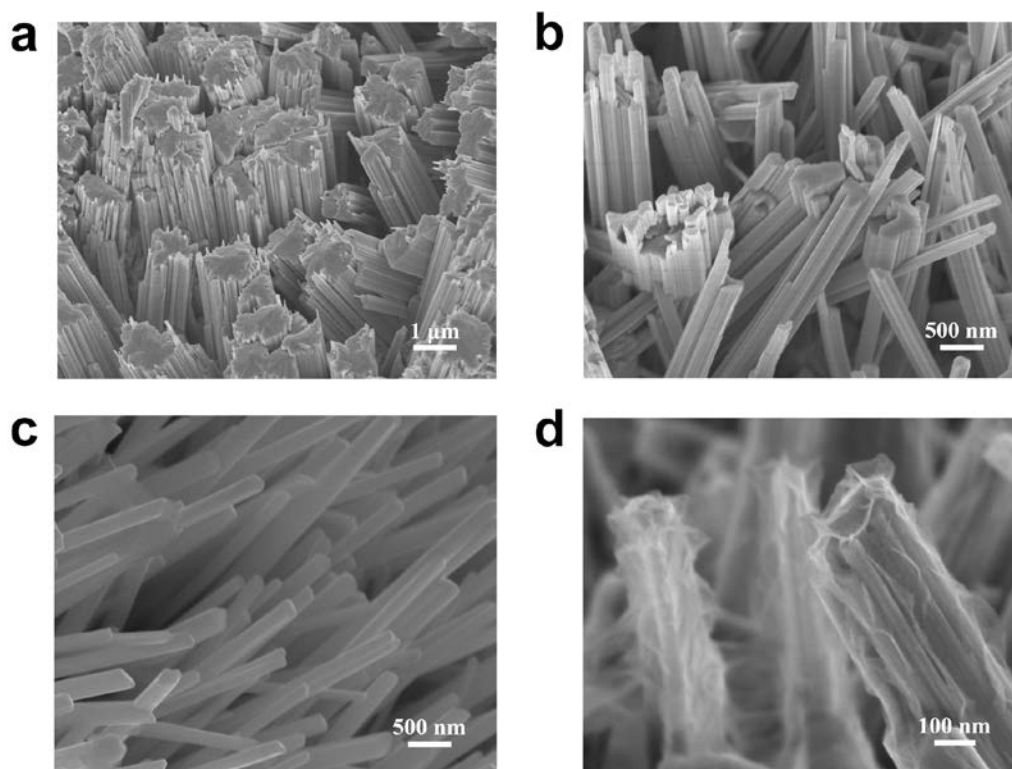

64

65 **Supplementary Fig. 1** SEM images of the W-NiS<sub>0.5</sub>Se<sub>0.5</sub> at the different stages of the  
 66 hydrothermal process (a) 5 h; (b) 10 h; (c) 15 h and (d) 20 h.

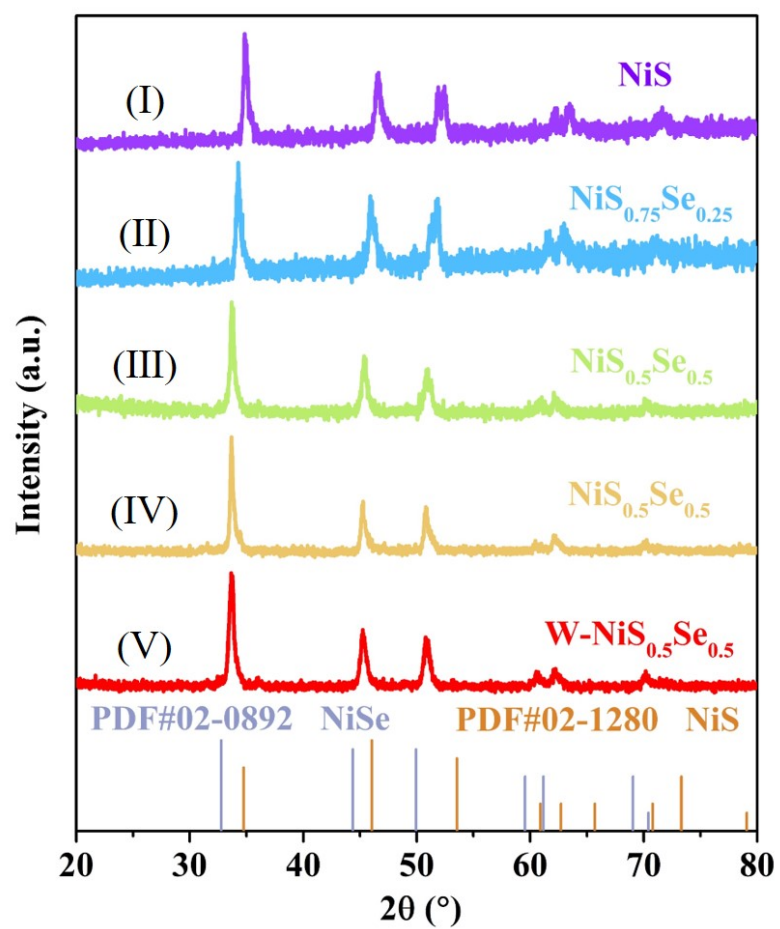

67

68 **Supplementary Fig. 2** XRD patterns of the W- $\text{NiS}_{0.5}\text{Se}_{0.5}$  at different stages of the

69 hydrothermal process (I) 5 h; (II) 10 h; (III) 15 h; (IV) 20 h; (V) 24 h.

70

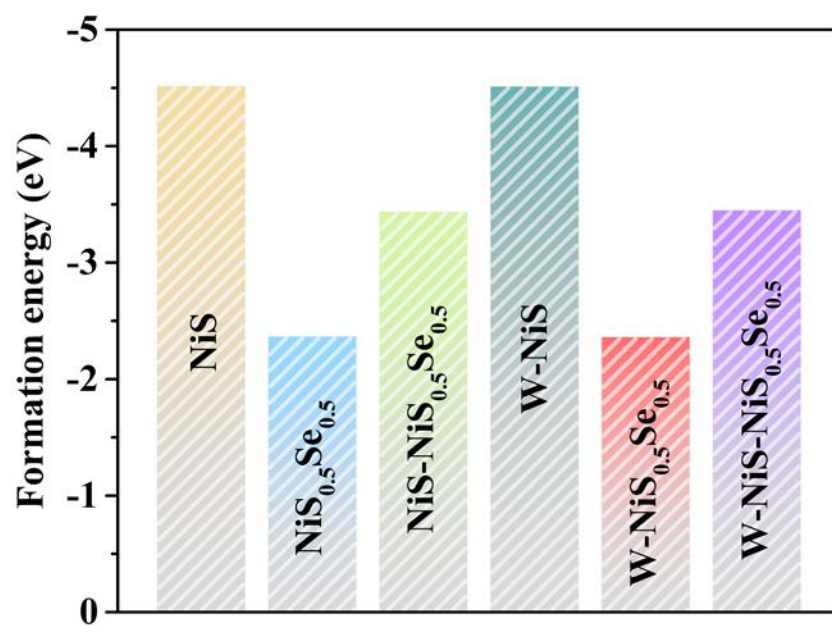

71

72 **Supplementary Fig. 3** The formation energy of prepared samples.

73

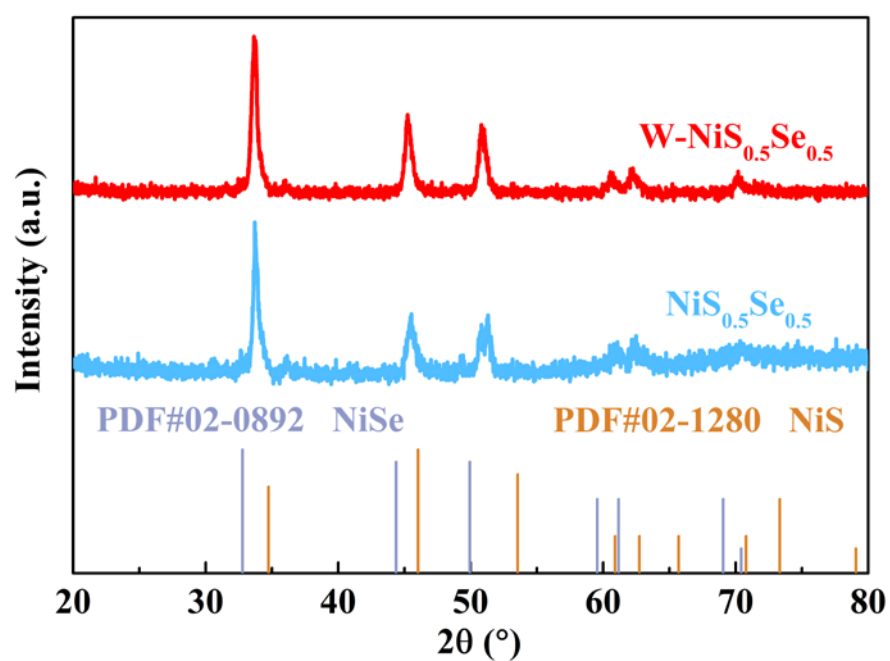

**Supplementary Fig. 4** XRD patterns of W-NiS<sub>0.5</sub>Se<sub>0.5</sub> and NiS<sub>0.5</sub>Se<sub>0.5</sub>.



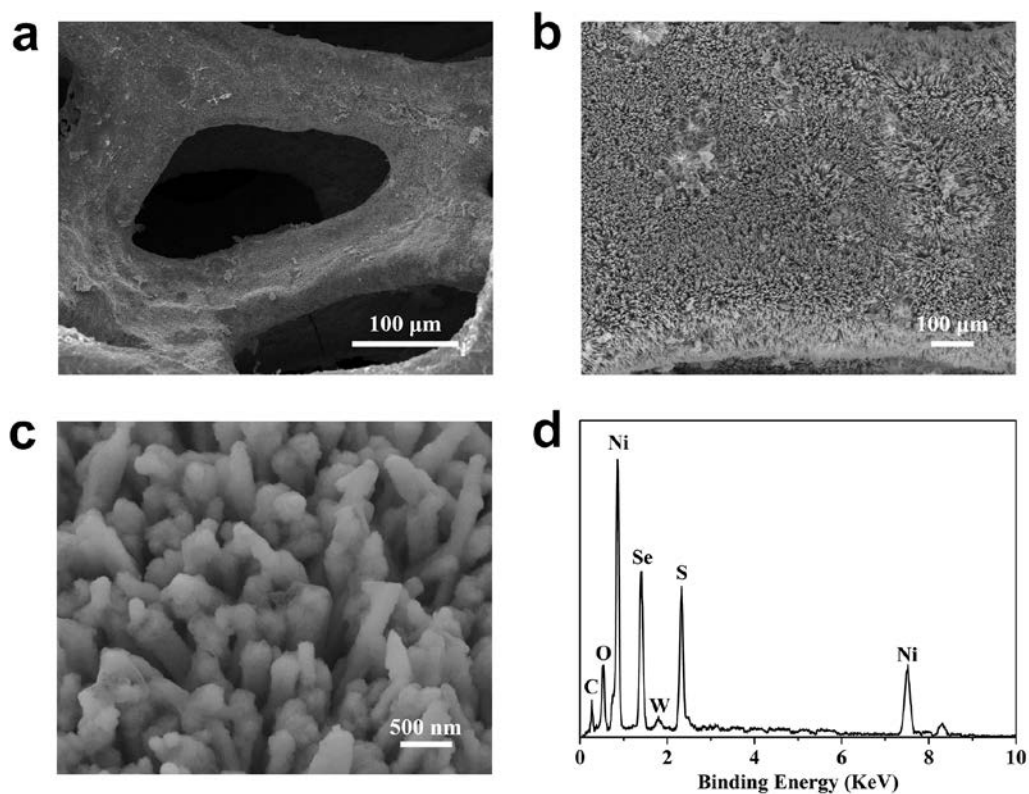

**Supplementary Fig. 5** (a-c) SEM images at different magnifications; (d)EDX spectrum of the W-NiS<sub>0.5</sub>Se<sub>0.5</sub>.

From high magnification SEM, we can see that the nanorod is wrapped by nanosheets and the diameter locates about 260 nm. From low magnification SEM, it can be seen that the nanorods are uniform and evenly grown on nickel foam skeleton. The atomic ratio of W: Ni: S: Se was 1.73: 49.67: 24.28: 24.32 from EDX (Supplementary Table 1).

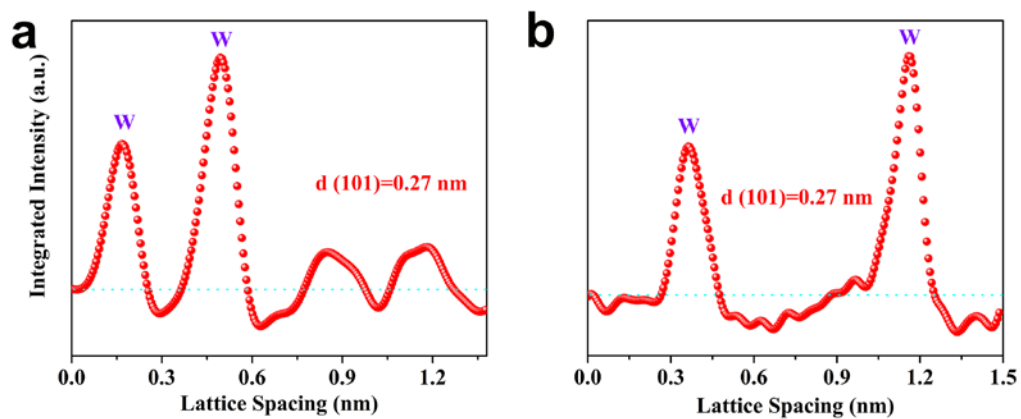

85

86 **Supplementary Fig. 6** Line-scanning intensity profile obtained from the area

87 highlighted with the yellow arrow in regions as shown in Fig. 1f.

88

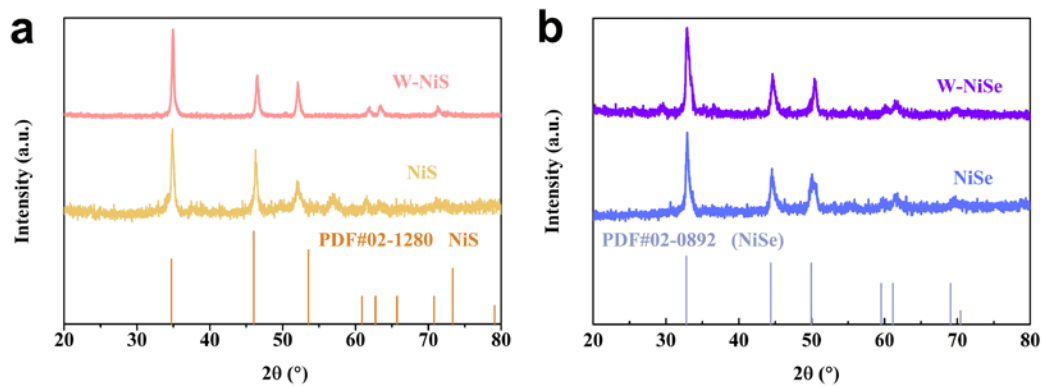

89

90 **Supplementary Fig. 7** XRD patterns of (a) W-NiS and NiS; (b) W-NiSe and NiSe.

91

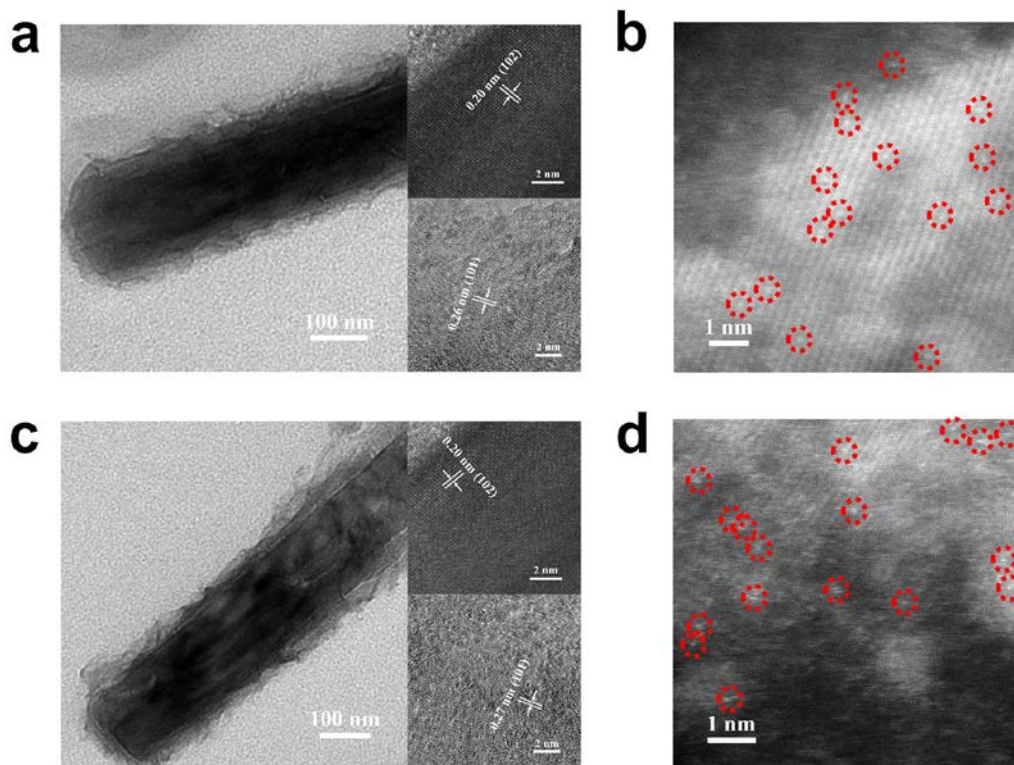

92

93 **Supplementary Fig. 8** The TEM, HRTEM, HAADF-STEM image of the (a-b)

94 W-NiS and (c-d) W-NiSe.

95

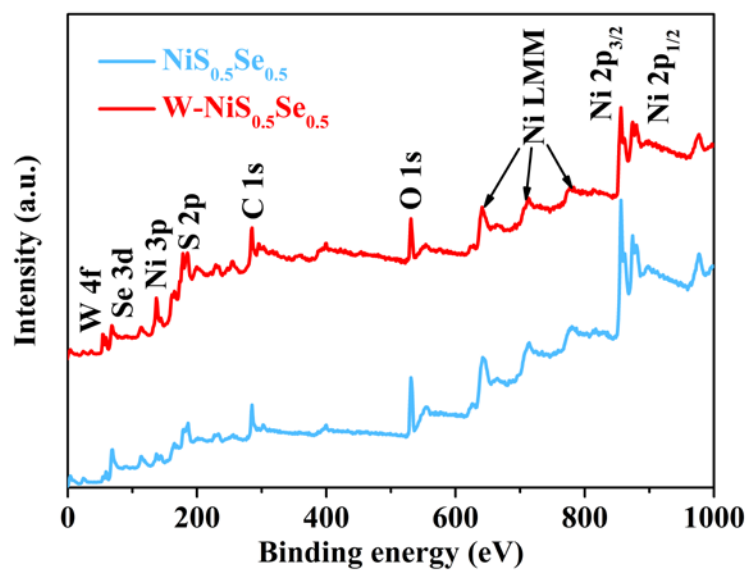

**Supplementary Fig. 9** The XPS survey spectra of the  $\text{W-NiS}_{0.5}\text{Se}_{0.5}$  and  $\text{NiS}_{0.5}\text{Se}_{0.5}$ .

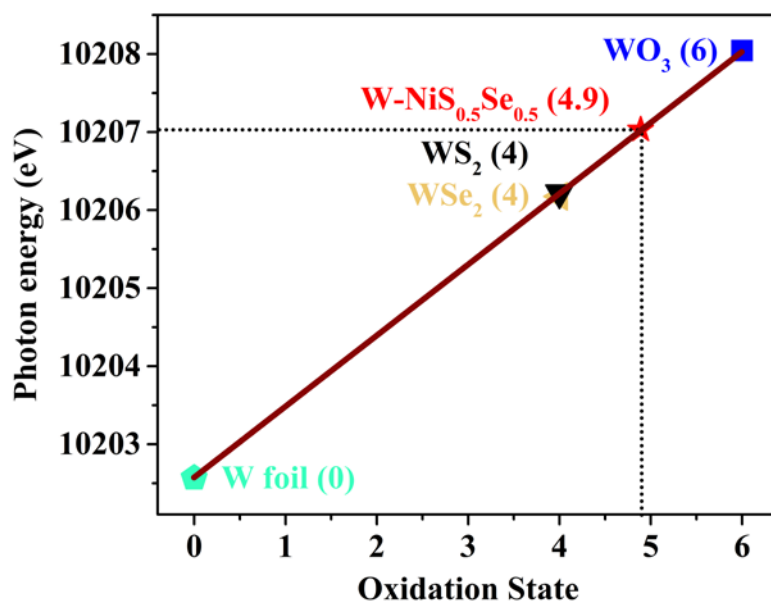

99

100 **Supplementary Fig. 10** The calculated average oxidation state of W in W-NiS<sub>0.5</sub>Se<sub>0.5</sub>

101 from XAS.

102

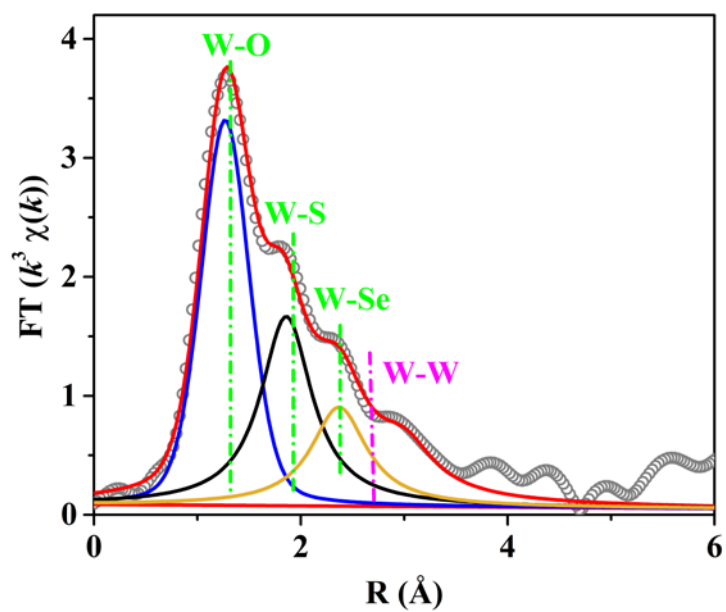

103

104 **Supplementary Fig. 11** Fourier transformed EXAFS spectra of the W-NiS<sub>0.5</sub>Se<sub>0.5</sub> at

105 the W L<sub>3</sub>-edge (scatter points) and the theoretical fits (solid lines).

106

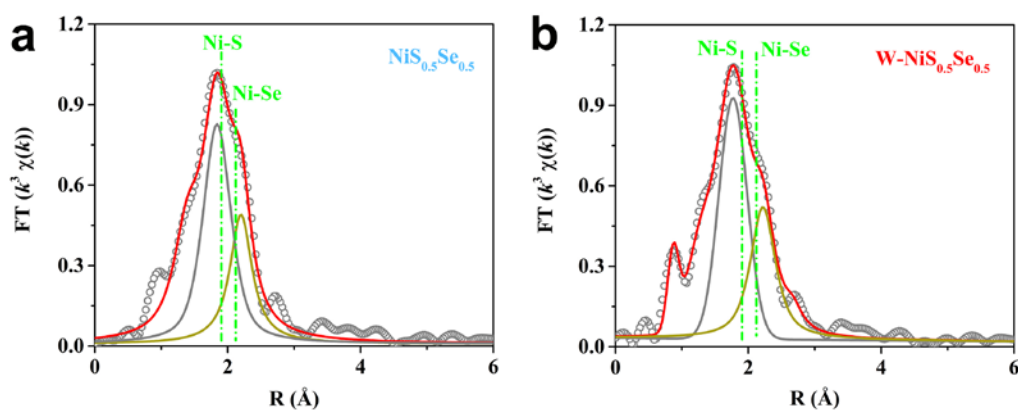

**Supplementary Fig. 12** Fourier transformed EXAFS spectra of the (a)  $\text{NiS}_{0.5}\text{Se}_{0.5}$  and (b)  $\text{W-NiS}_{0.5}\text{Se}_{0.5}$  at the Ni K-edge (scatter points) and the theoretical fits (solid lines).



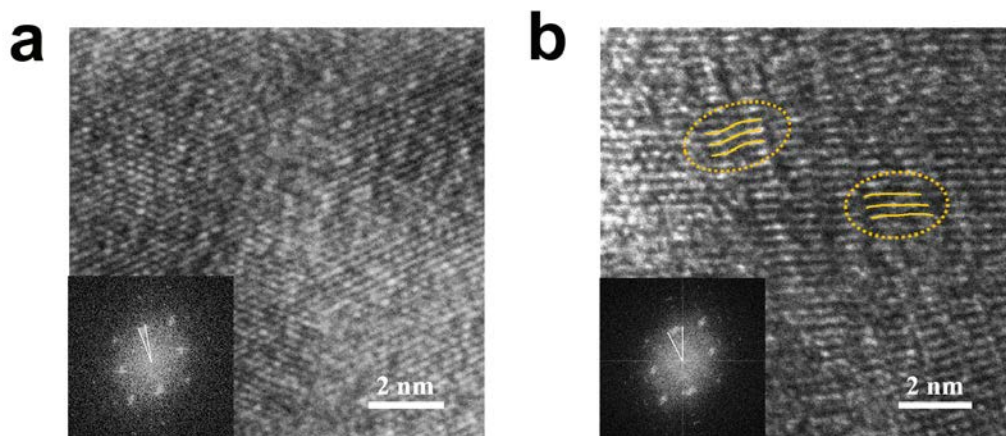

111

112 **Supplementary Fig. 13** HRTEM images and corresponding FFT patterns (insets) for

113 (a) virgin  $\text{NiS}_{0.5}\text{Se}_{0.5}$  and (b)  $\text{W-NiS}_{0.5}\text{Se}_{0.5}$ . The subtle distortion regions are marked

114 by the orange lines in the Supplementary Fig. 13b.

115

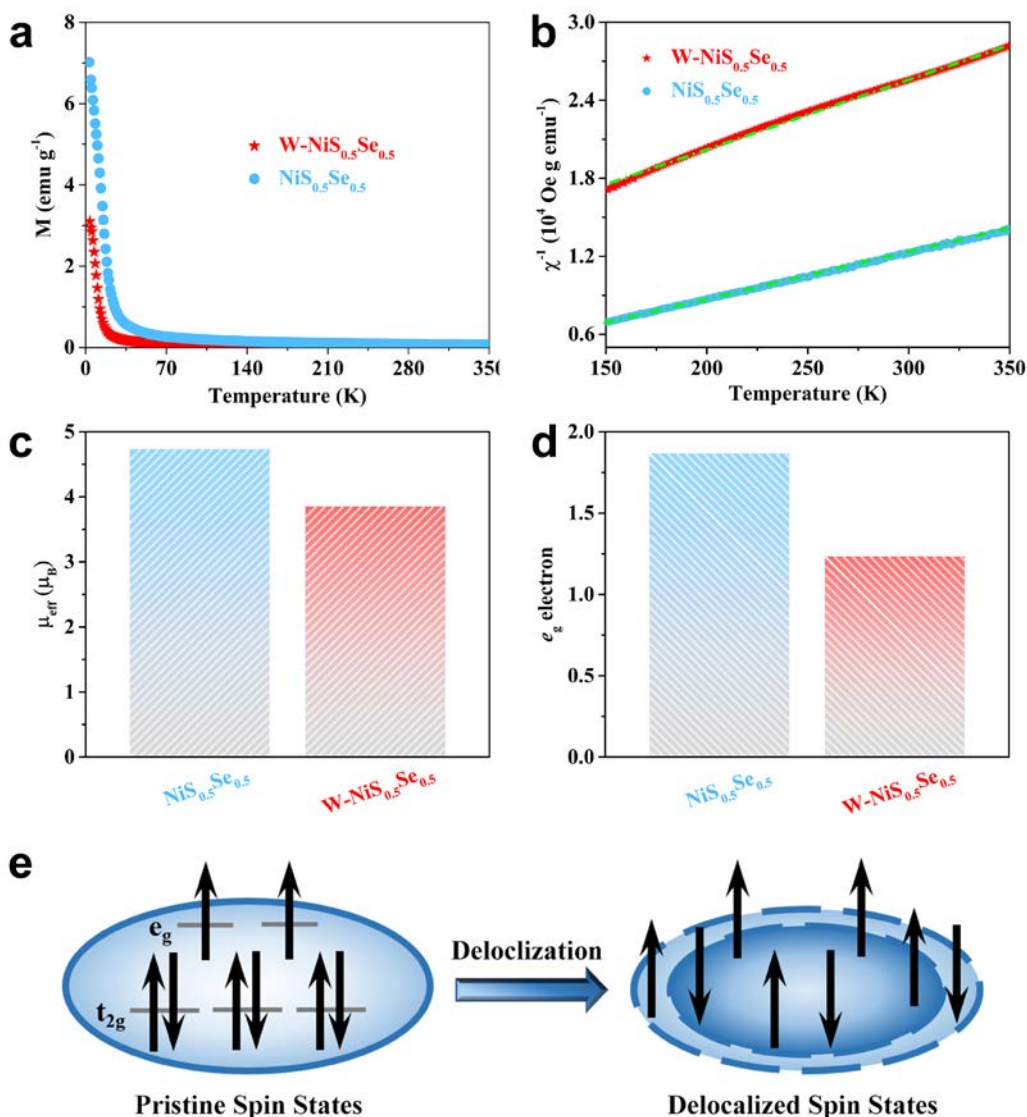

**Supplementary Fig. 14** (a) Temperature dependent magnetization under  $H=1$  kOe; (b) Temperature dependent inverse susceptibilities fitted by Curie–Weiss law, and calculated (c) effective magnetic moment ( $\mu_{eff}$ ) and (d)  $e_g$  occupancy of  $W-NiS_{0.5}Se_{0.5}$  and  $NiS_{0.5}Se_{0.5}$ . (e) Schematic representations of the formation mechanism for the subtle distortion of atomic arrangement through the incorporated heterogeneous spin states.

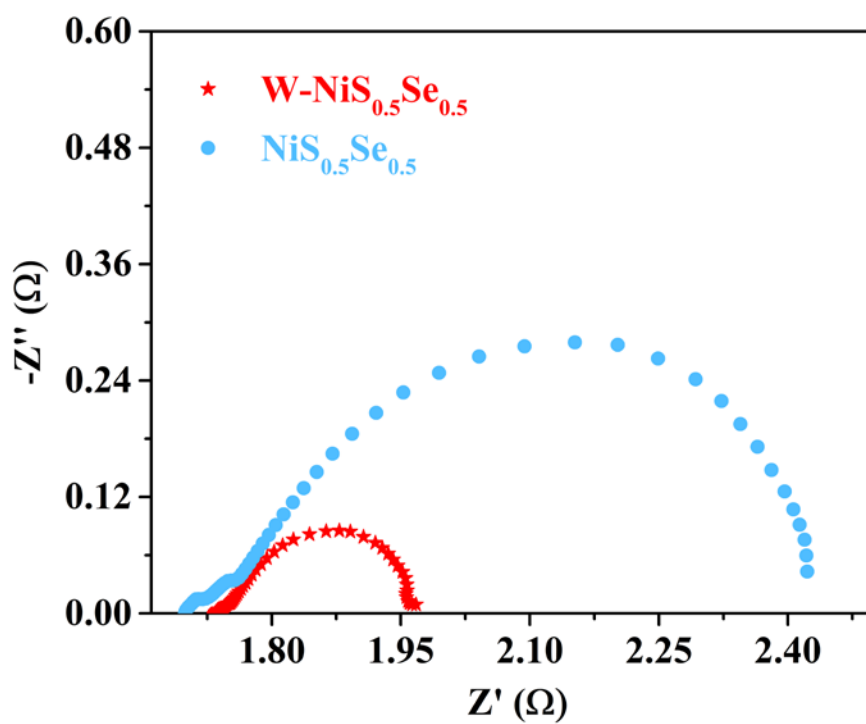

124

125 **Supplementary Fig. 15** Nyquist plots of the W-NiS<sub>0.5</sub>Se<sub>0.5</sub> and NiS<sub>0.5</sub>Se<sub>0.5</sub> for the

126 HER electrocatalysis.

127

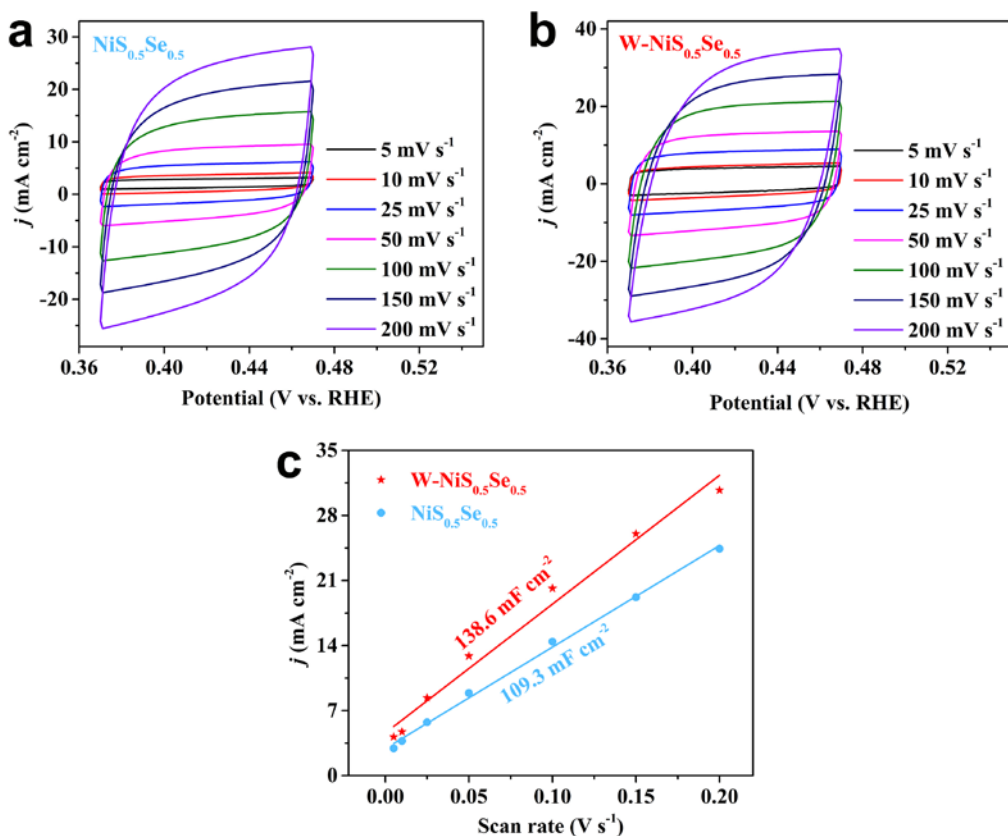

128

129 **Supplementary Fig. 16** (a-b) Typical cyclic voltammograms at the scan rates ranging  
 130 from 5 to 200  $\text{mV s}^{-1}$  of the  $\text{NiS}_{0.5}\text{Se}_{0.5}$  and  $\text{W-NiS}_{0.5}\text{Se}_{0.5}$  with different values, the  
 131 scanning potential range is from 0.37 to 0.47 V vs RHE; (b) Linear fitting of the  
 132 capacitive current densities vs the scan rates.

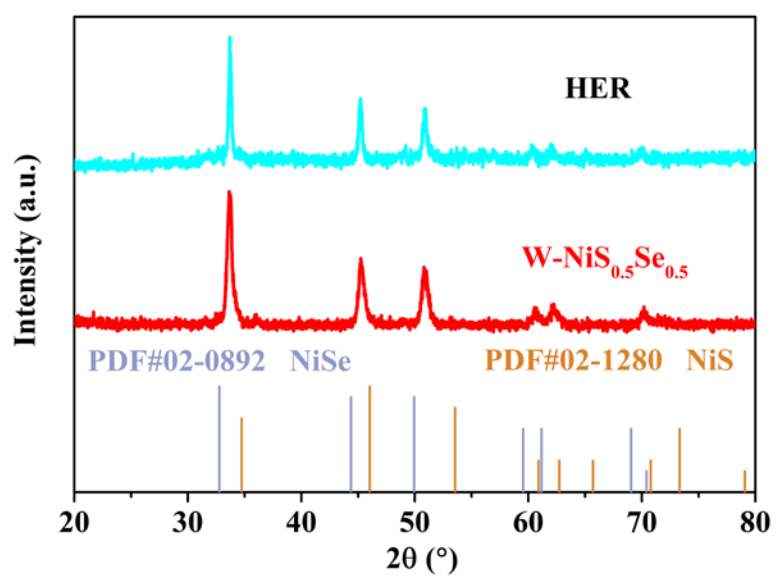

**Supplementary Fig. 17** XRD characterizations of the W-NiS<sub>0.5</sub>Se<sub>0.5</sub> after HER stability test.

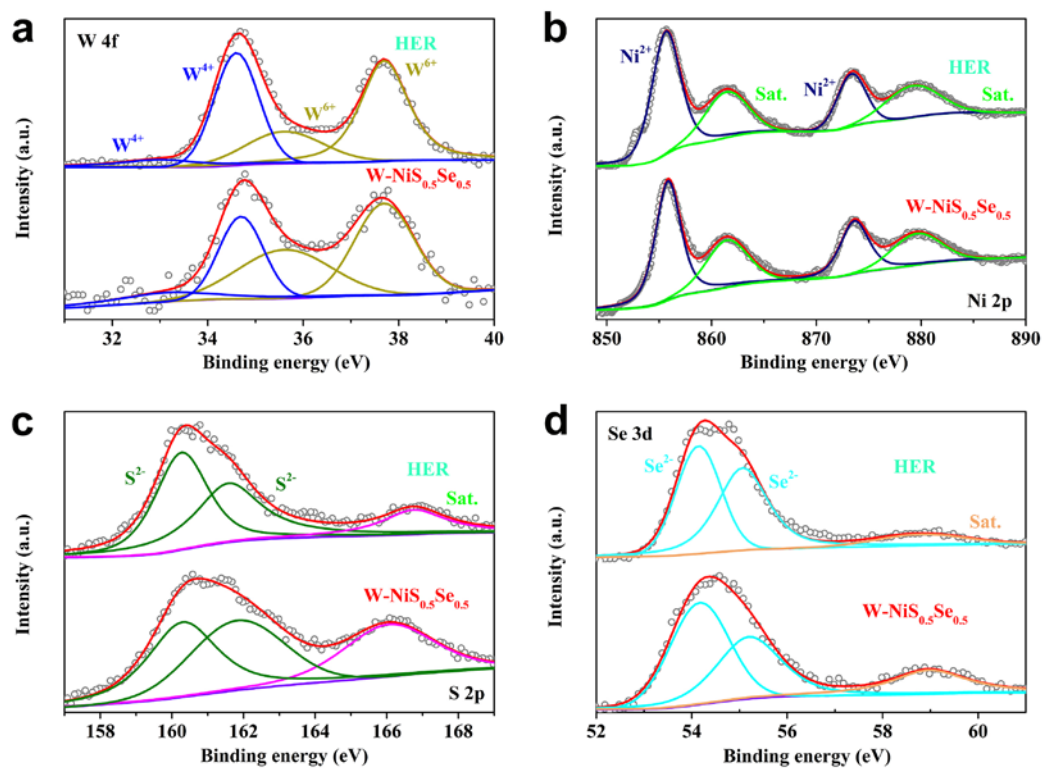

137

138 **Supplementary Fig. 18** High-resolution XPS characterizations of the W-NiS<sub>0.5</sub>Se<sub>0.5</sub>

139 before and after HER stability test. (a) W 4f; (b) Ni 2p; (c) S 2p; and (d) Se 3d.

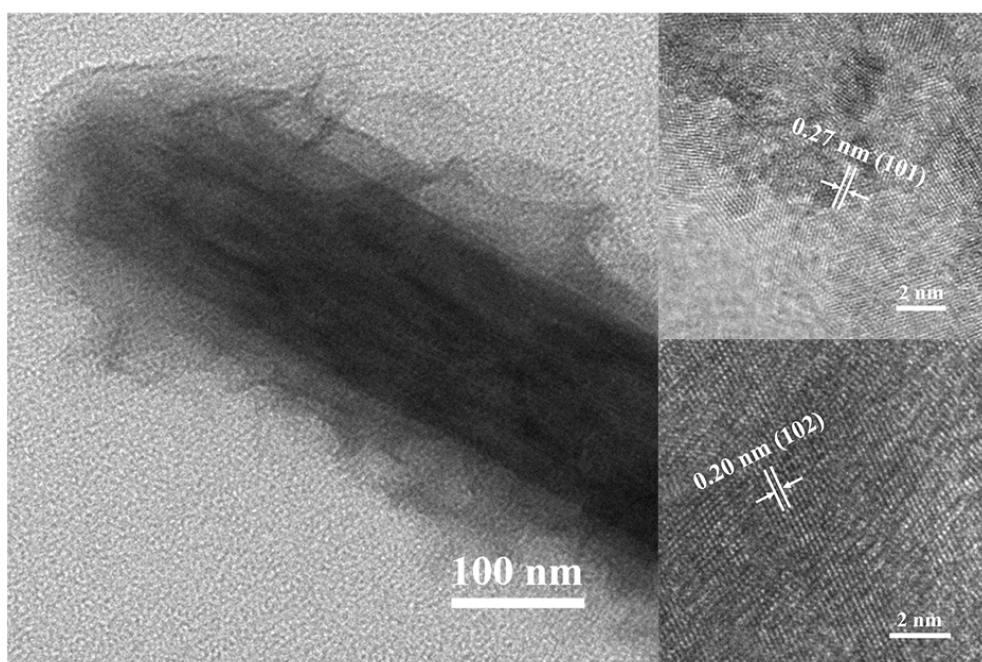

140

141 **Supplementary Fig. 19** TEM and HRTEM images of the W-NiS<sub>0.5</sub>Se<sub>0.5</sub> after HER

142 stability test.

143



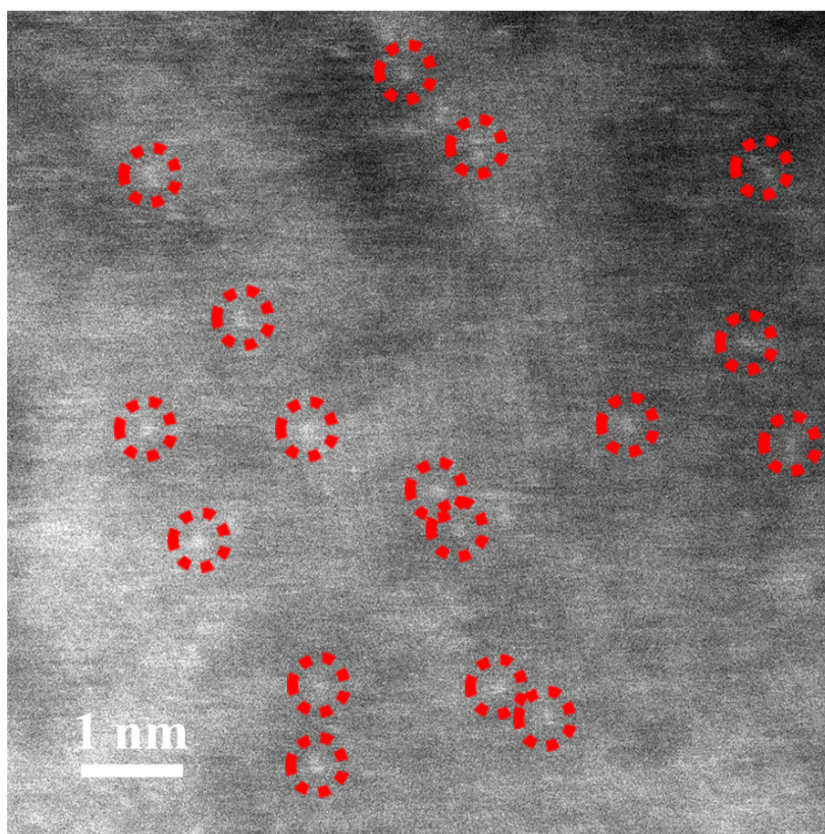

144

145 **Supplementary Fig. 20** HADDF-STEM images of the W-NiS<sub>0.5</sub>Se<sub>0.5</sub> after HER

146 stability test.



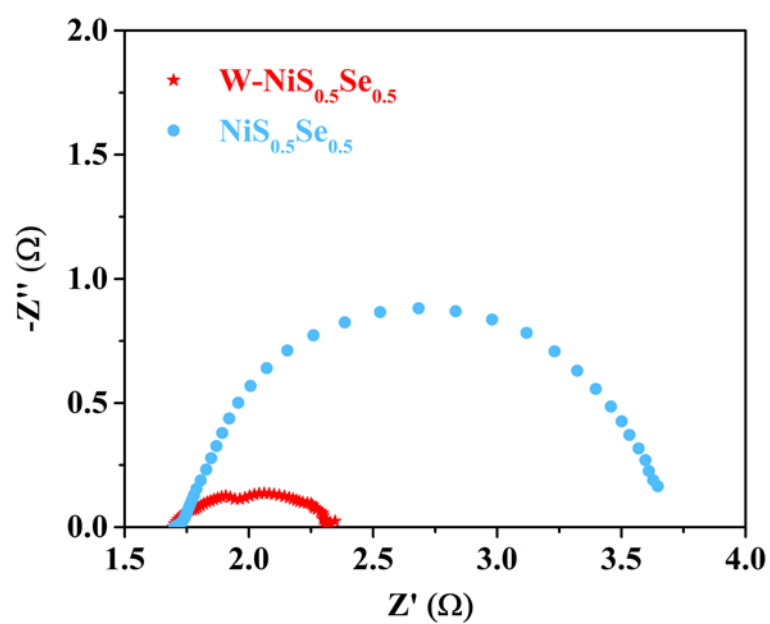

147

148 **Supplementary Fig. 21** Nyquist plots of the W-NiS<sub>0.5</sub>Se<sub>0.5</sub> and NiS<sub>0.5</sub>Se<sub>0.5</sub> for the

149 OER electrocatalysis.

150

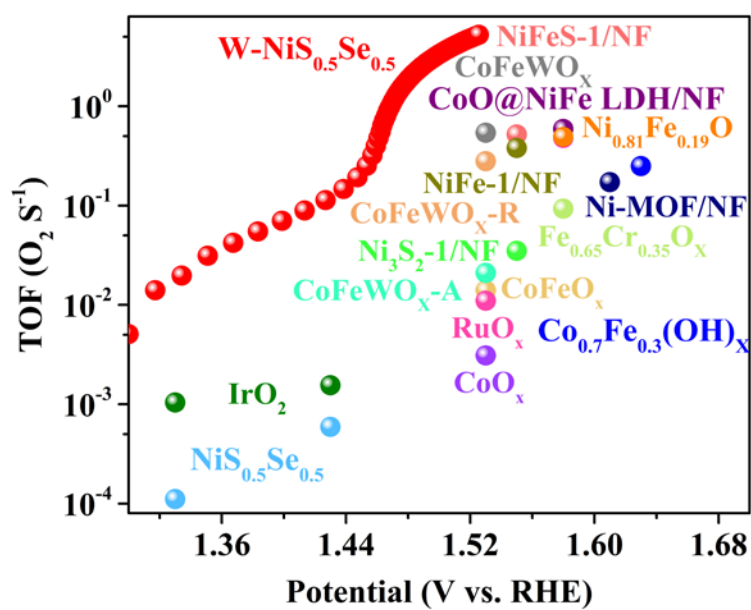

151

152 **Supplementary Fig. 22** TOF value of the W-NiS<sub>0.5</sub>Se<sub>0.5</sub> and previous reports for the

153 OER electrocatalysis (Table S7).

154

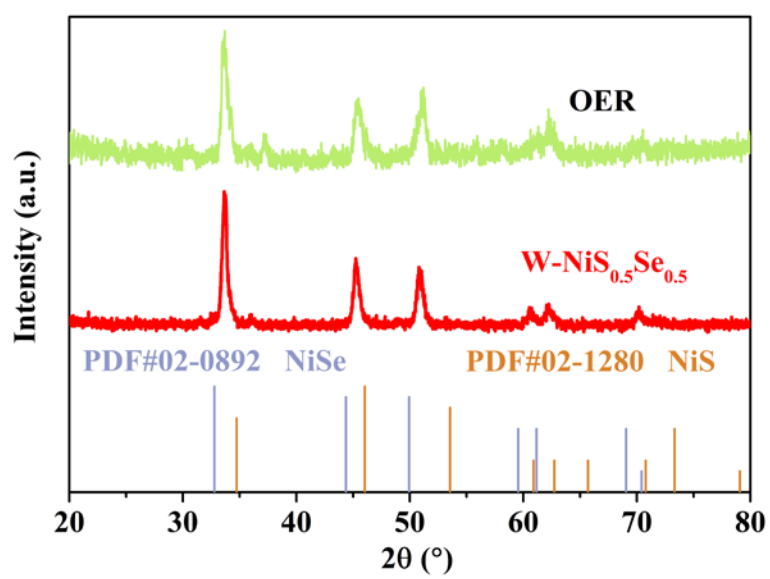

**Supplementary Fig. 23** XRD characterizations of the W-NiS<sub>0.5</sub>Se<sub>0.5</sub> after OER stability test.

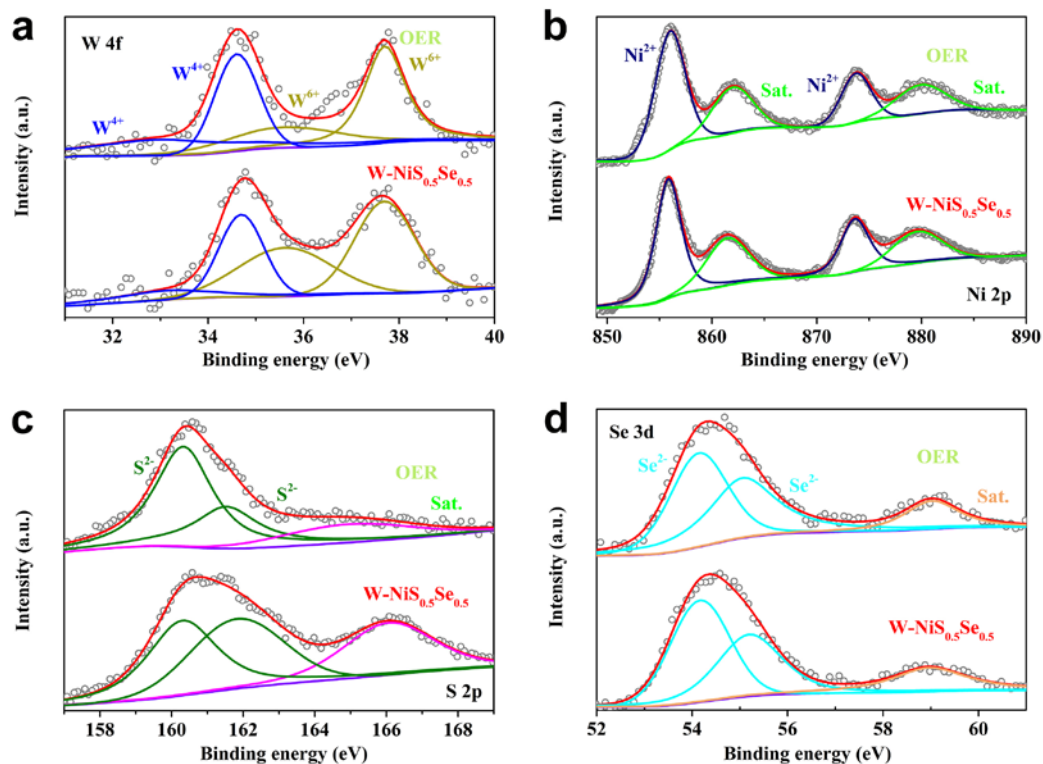

159

160 **Supplementary Fig. 24** High-resolution XPS characterizations of the  $W-NiS_{0.5}Se_{0.5}$

161 before and after OER stability test. (a) W 4f; (b) Ni 2p; (c) S 2p; and (d) Se 3d.

162

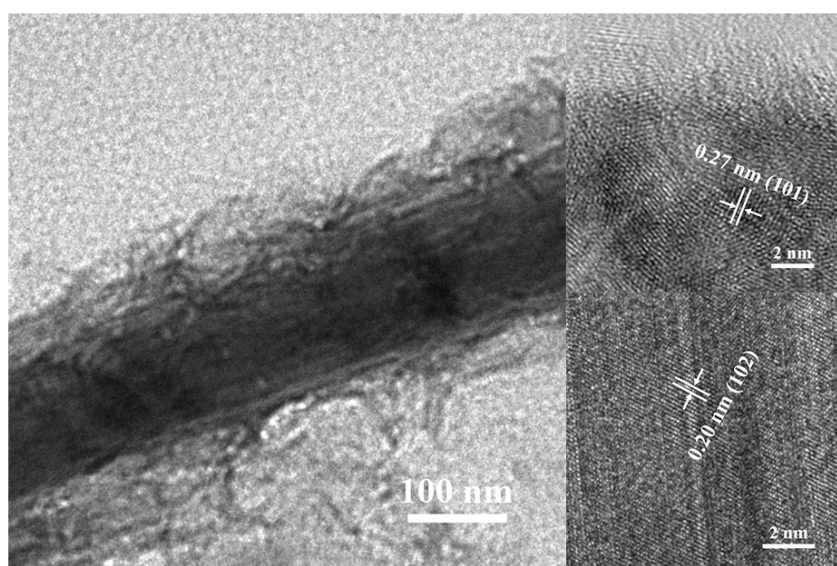

163

164 **Supplementary Fig. 25** TEM and HRTEM images of the W-NiS<sub>0.5</sub>Se<sub>0.5</sub> after OER

165 stability test.

166

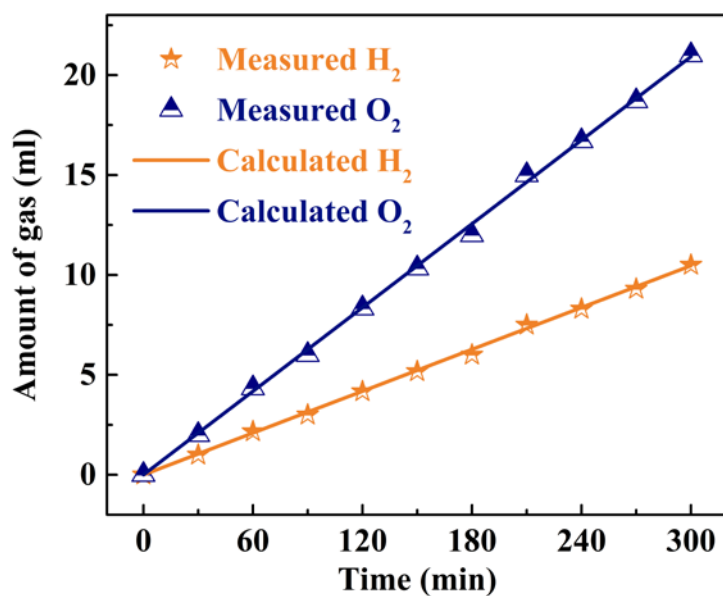

167

168 **Supplementary Fig. 26** Theoretical and experimental gas volume versus time of

169 W-NiS<sub>0.5</sub>Se<sub>0.5</sub> for the overall water-splitting process.

170

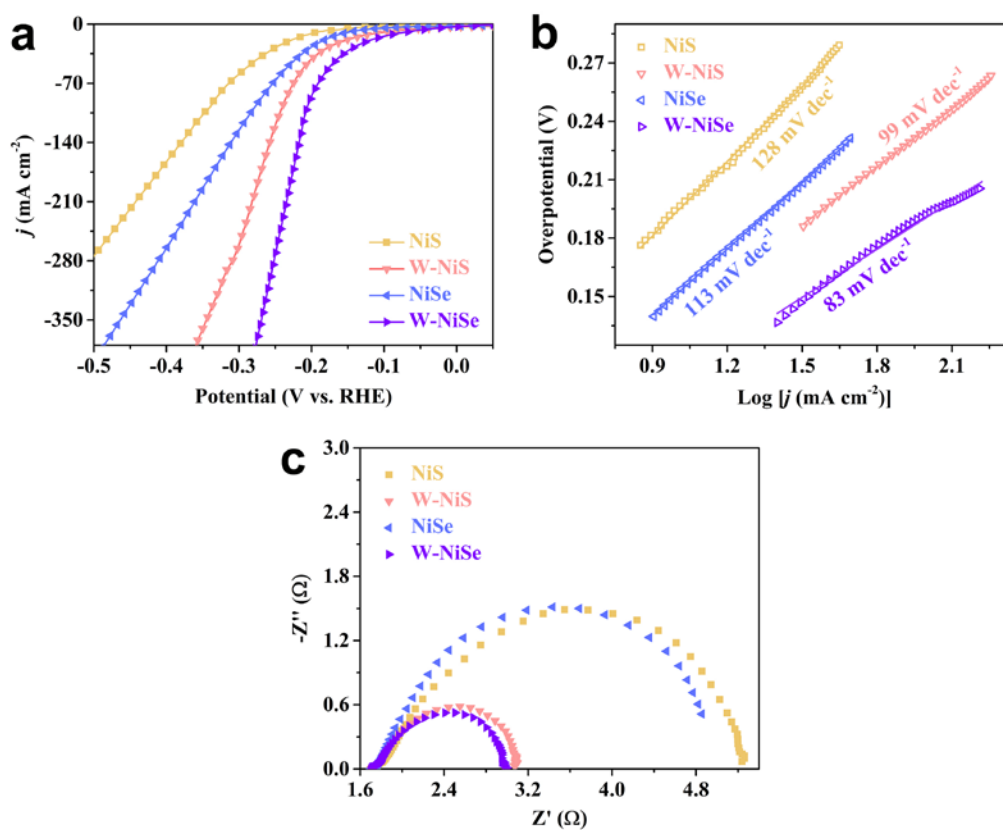

171

172 **Supplementary Fig. 27** HER electrocatalytic properties of the prepared samples. (a)

173 Polarization curves; (b) The corresponding Tafel plots derived from the polarization

174 curves; (c) Nyquist plots of the NiS, W-NiS, NiSe and W-NiSe.

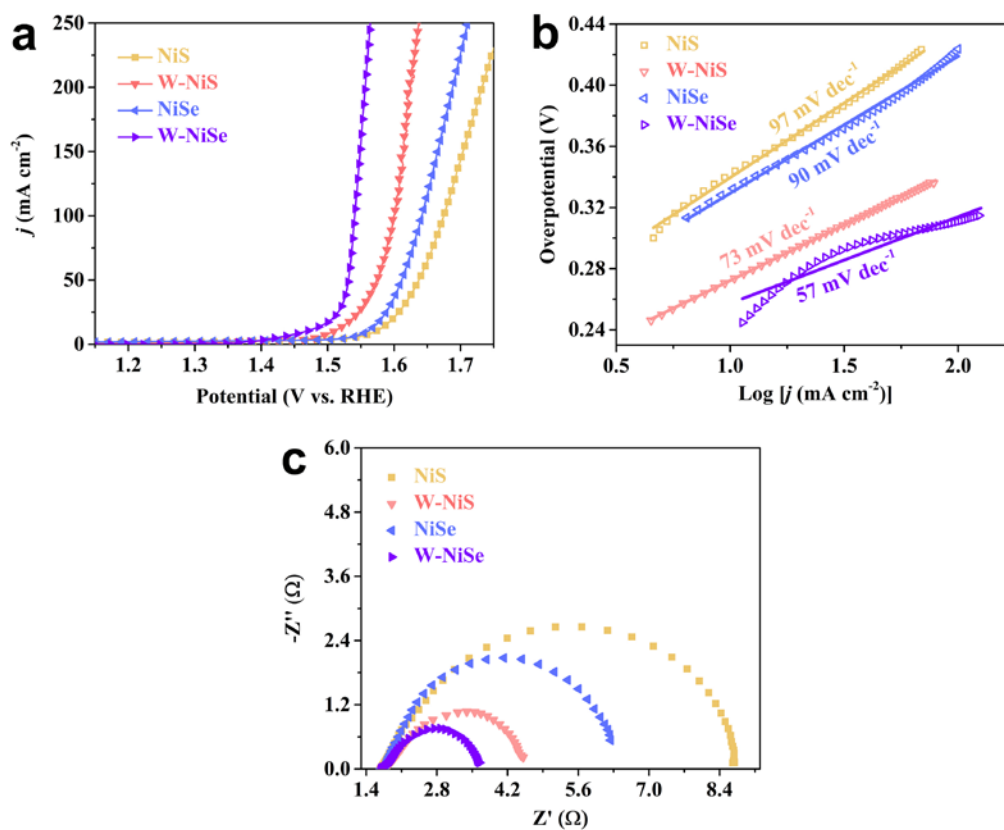

**Supplementary Fig. 28** OER electrocatalytic properties of the prepared samples. (a) Polarization curves; (b) The corresponding Tafel plots derived from the polarization curves; (c) Nyquist plots of the NiS, W-NiS, NiSe and W-NiSe.



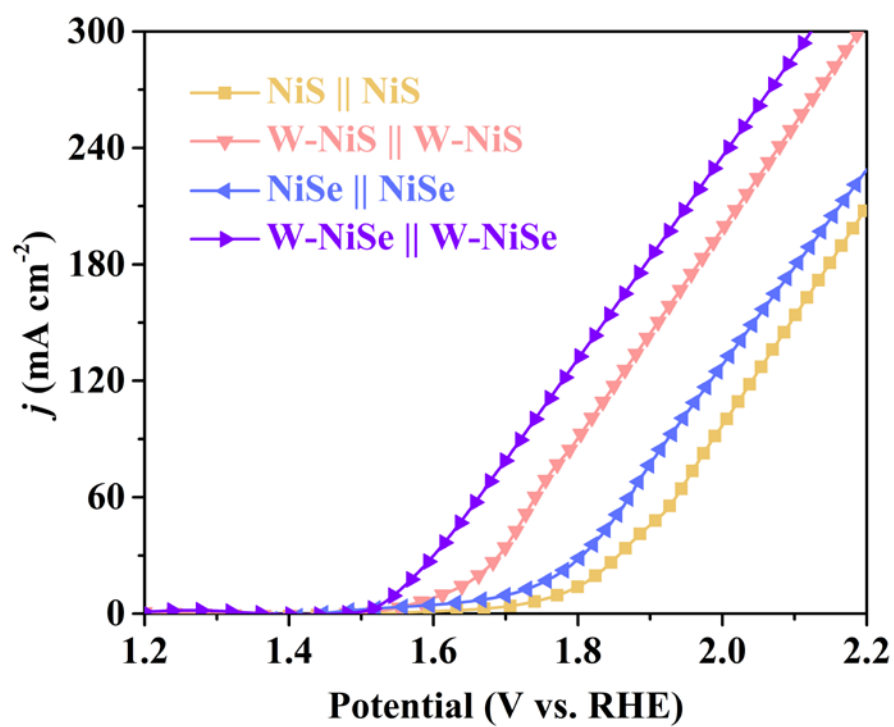

180

181 **Supplementary Fig. 29** Polarization curves for the overall water splitting using the

182 NiS, W-NiS, NiSe and W-NiSe as both the anode and cathode electrodes.

183

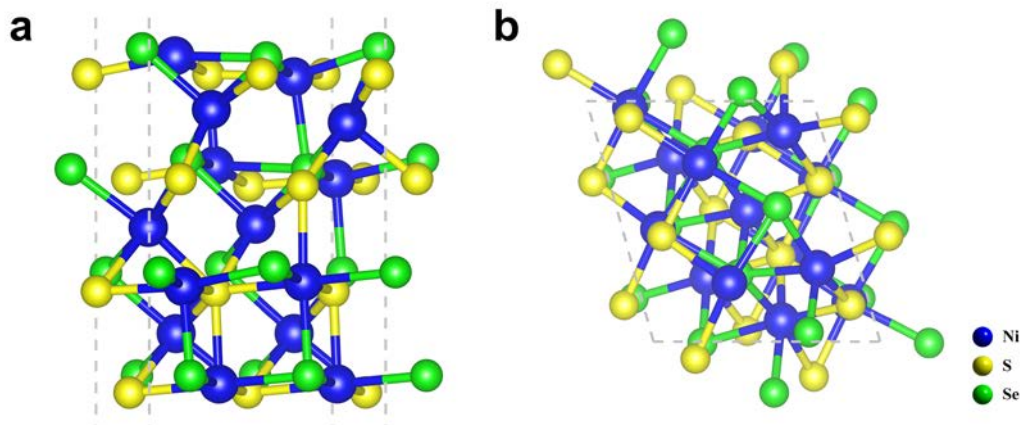

184

185 **Supplementary Fig. 30** (a) The side-view schematic model of the  $\text{NiS}_{0.5}\text{Se}_{0.5}$ ; (b) The

186 top-view schematic model of the  $\text{NiS}_{0.5}\text{Se}_{0.5}$ .

187

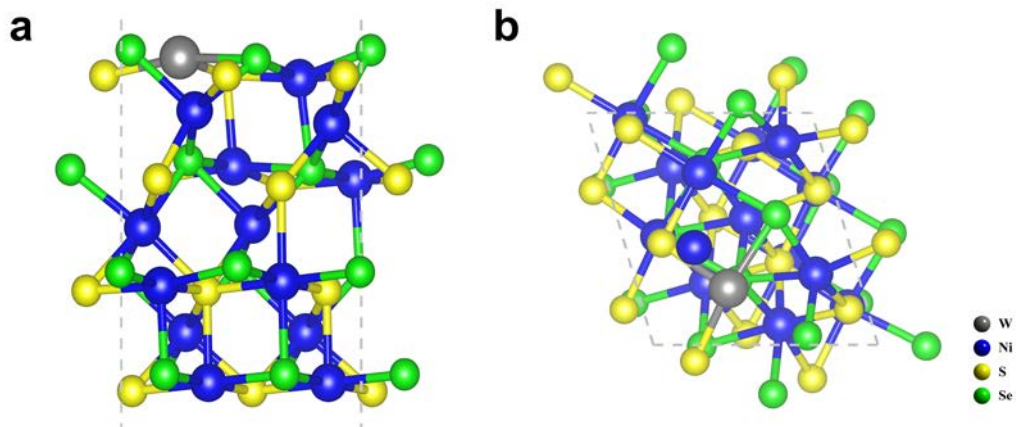

188

189 **Supplementary Fig. 31** (a) The side-view schematic model of the W-NiS<sub>0.5</sub>Se<sub>0.5</sub>; (b)

190 The top-view schematic model of the W-NiS<sub>0.5</sub>Se<sub>0.5</sub>.

191

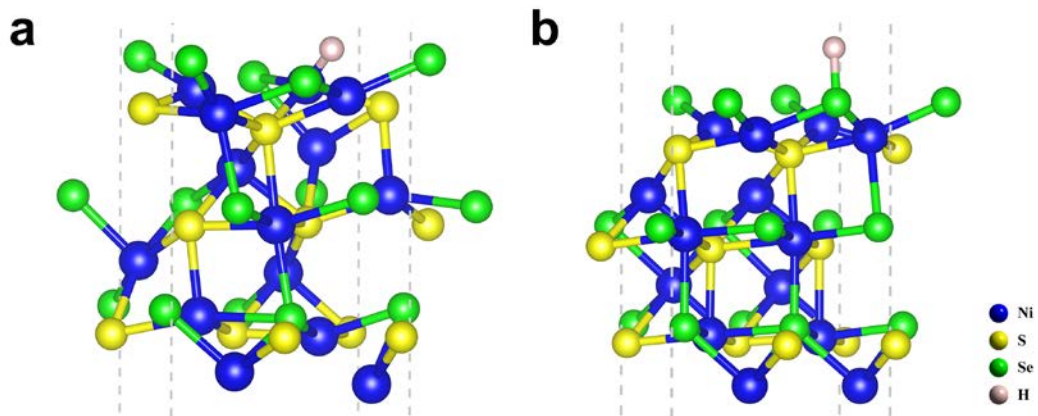

192

193 **Supplementary Fig. 32** Side-view schematic model of the  $\text{NiS}_{0.5}\text{Se}_{0.5}$  (Ni and Se site)

194 with  $\text{H}^*$  adsorbed on its surface.

195

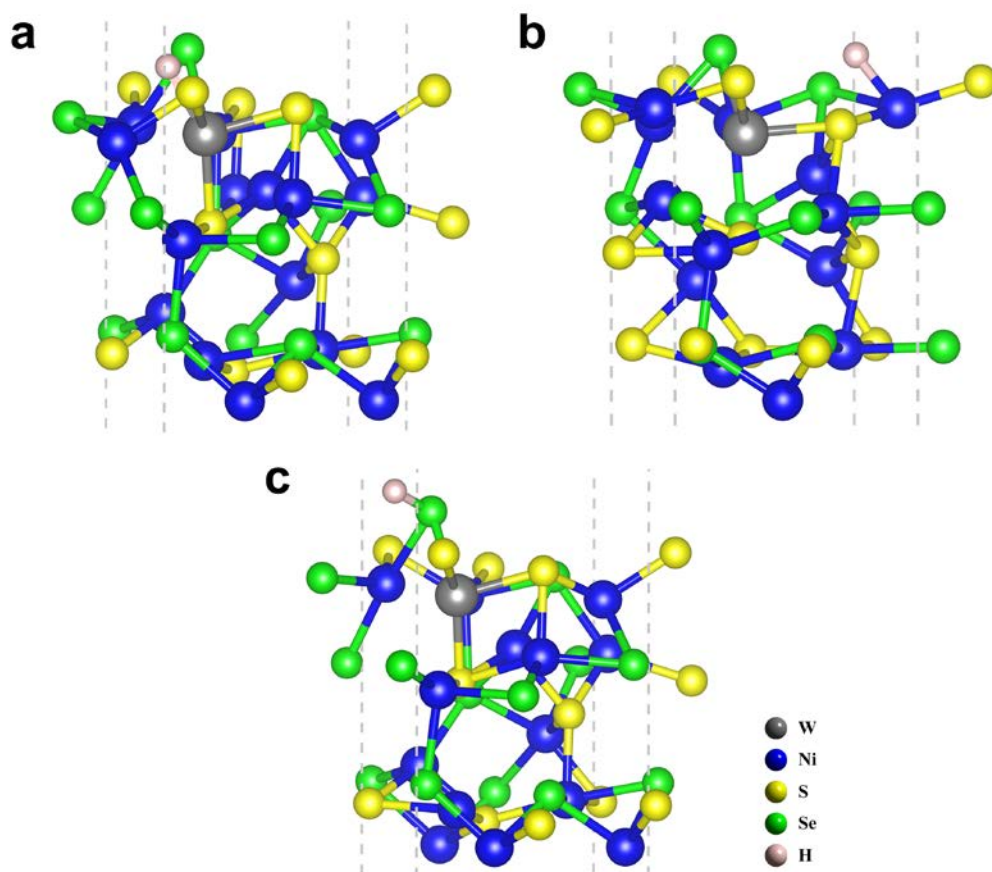

196

197 **Supplementary Fig. 33** Side-view schematic model of the W-NiS<sub>0.5</sub>Se<sub>0.5</sub> (W, Ni and

198 Se site) with H\* adsorbed on its surface.

199

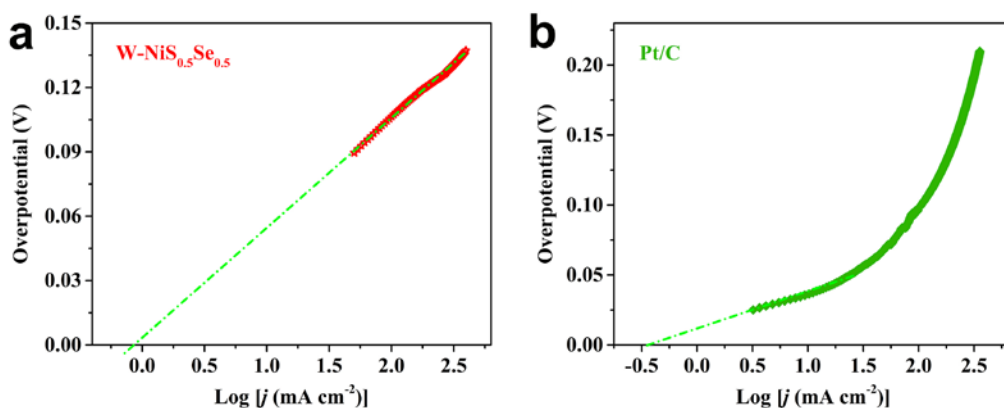

**Supplementary Fig. 34** Calculation of the exchange current density,  $j_0$ , of (a) W-NiS<sub>0.5</sub>Se<sub>0.5</sub> and (b) Pt/C catalysts by the linear fitting of Tafel plot.

The calculated  $j_0$  of W-NiS<sub>0.5</sub>Se<sub>0.5</sub> is  $8.574 \times 10^{-4}$  A cm<sup>-2</sup>. The calculated  $j_0$  of Pt/C is  $3.728 \times 10^{-4}$  A cm<sup>-2</sup>, which agrees well with the reported data<sup>6</sup>.

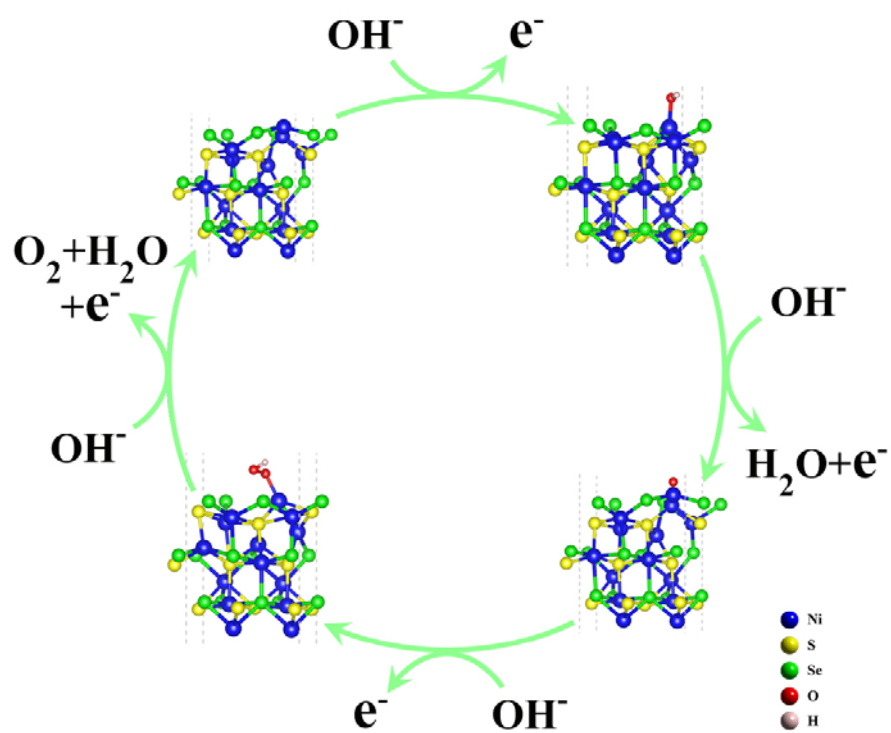

206

207 **Supplementary Fig. 35** The proposed possible process of  $\text{NiS}_{0.5}\text{Se}_{0.5}$  on OER

208 process.

209

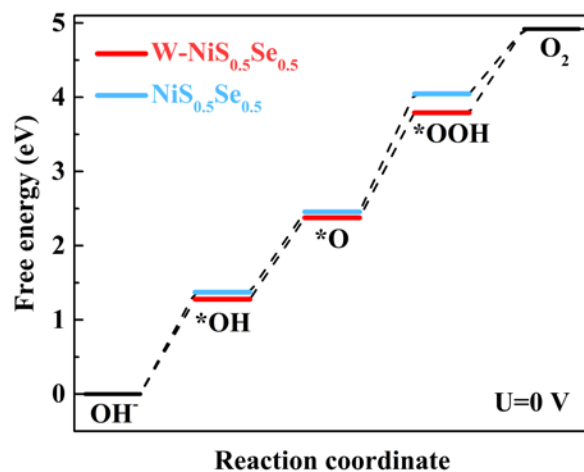

210

211 **Supplementary Fig. 36** Gibbs free-energy diagram of various oxygen species for

212 W-NiS<sub>0.5</sub>Se<sub>0.5</sub> and NiS<sub>0.5</sub>Se<sub>0.5</sub> during OER process at 0 V.

213



214 **Supplementary Table 1** The atomic ratio of W: Ni: S: Se of W-NiS<sub>0.5</sub>Se<sub>0.5</sub> at different  
 215 stages of the hydrothermal process (I) 5 h; (II) 10 h; (III) 15 h; (IV) 20 h; (V) 24 h.

| W: Ni: S: Se ratio from EDX (at.%) |                           |
|------------------------------------|---------------------------|
| I                                  | - : 54.23: 45.77: -       |
| II                                 | - : 52.89: 35.83: 11.28   |
| III                                | - : 53.75: 23.01: 23.24   |
| IV                                 | - : 52.74: 24.01: 23.25   |
| V                                  | 1.73: 49.67: 24.28: 24.32 |

216

217 **Supplementary Table 2** The atomic ratio of W: Ni of W-NiS<sub>0.5</sub>Se<sub>0.5</sub> samples.

|                                        | W: Ni          | W: Ni          | W: Ni          |
|----------------------------------------|----------------|----------------|----------------|
|                                        | ratio from ICP | ratio from EDX | ratio from XPS |
|                                        | (at.%)         | (at.%)         | (at.%)         |
| W-NiS <sub>0.5</sub> Se <sub>0.5</sub> | 3.06: 96.94    | 3.37: 96.63    | 6.48: 93.52    |

218

219     **Supplementary Table 3** The atomic ratio of W: Ni: S: Se of NiS, W-NiS, NiSe and

220     W-NiSe samples.

| W: Ni: S: Se ratio from EDX (at.%) |                       |
|------------------------------------|-----------------------|
| NiS                                | -: 52.11: 47.89: -    |
| W-NiS                              | 1.51: 49.44: 49.05: - |
| NiSe                               | -: 49.93: -: 50.07    |
| W-NiSe                             | 1.95: 48.98: -: 48.98 |

221

222 **Supplementary Table 4** Chemical composition and electrocatalytic performance of  
 223 W-NiS<sub>0.5</sub>Se<sub>0.5</sub>, NiS<sub>0.5</sub>Se<sub>0.5</sub>, W-NiS, NiS, W-NiSe and NiSe catalysts.

| Samples                                            | W-NiS <sub>0.5</sub> Se <sub>0.5</sub> | NiS <sub>0.5</sub> Se <sub>0.5</sub> | NiS  | W-NiS | NiSe | W-NiSe |
|----------------------------------------------------|----------------------------------------|--------------------------------------|------|-------|------|--------|
| <b><math>\eta_{10}</math> HER (mV)</b>             | 39                                     | 72                                   | 196  | 105   | 152  | 75     |
| <b><math>\eta_{100}</math> HER (mV)</b>            | 106                                    | 169                                  | 342  | 241   | 280  | 207    |
| <b>Tafel HER<br/>(mV dec<sup>-1</sup>)</b>         | 51                                     | 79                                   | 128  | 99    | 113  | 83     |
| <b>R<sub>ct</sub> HER (<math>\Omega</math>)</b>    | 0.23                                   | 0.72                                 | 3.53 | 1.13  | 3.15 | 1.29   |
| <b><math>\eta_{10}</math> OER (mV)</b>             | 171                                    | 257                                  | 342  | 279   | 330  | 237    |
| <b><math>\eta_{100}</math> OER (mV)</b>            | 239                                    | 331                                  | 445  | 370   | 412  | 311    |
| <b>Tafel OER<br/>(mV dec<sup>-1</sup>)</b>         | 41                                     | 62                                   | 97   | 73    | 90   | 57     |
| <b>R<sub>ct</sub> OER (<math>\Omega</math>)</b>    | 0.65                                   | 1.95                                 | 6.97 | 2.81  | 4.55 | 1.95   |
| <b>C<sub>dl</sub> (mF cm<sup>-2</sup>)</b>         | 138.6                                  | 109.3                                | -    | -     | -    | -      |
| <b><math>\eta_{10}</math> water splitting (V)</b>  | 1.44                                   | 1.56                                 | 1.78 | 1.61  | 1.71 | 1.55   |
| <b><math>\eta_{100}</math> water splitting (V)</b> | 1.55                                   | 1.74                                 | 2.01 | 1.82  | 1.94 | 1.74   |

225 **Supplementary Table 5** Comparison of the HER performances between  
 226 W-NiS<sub>0.5</sub>Se<sub>0.5</sub> in this work and other reported electrocatalysts.

| Materials                                     | Overpotent<br>ial<br>(mV) | Tafel<br>(mV<br>dec <sup>-1</sup> ) | Current<br>density<br>(mA cm <sup>-2</sup> ) | TOF<br>(s <sup>-1</sup> /mV) | Ref.         |
|-----------------------------------------------|---------------------------|-------------------------------------|----------------------------------------------|------------------------------|--------------|
| W-NiS <sub>0.5</sub> Se <sub>0.5</sub>        | 39/106/129                | 51                                  | 10/100/300                                   | 1.105/200<br>5.316/135       | This<br>work |
| Co-NG-MW                                      | 175                       | 80                                  | 10                                           | 0.385/100                    | 7            |
| Co-NG                                         | 147                       | 82                                  | 10                                           | 1.189/200                    | 8            |
| Mo <sub>1</sub> N <sub>1</sub> C <sub>2</sub> | 132                       | 90                                  | 10                                           | 1.46/150                     | 9            |
| Co-SAS-HOPNC                                  | 137                       | 52                                  | 10                                           | 3.8/200                      | 10           |
| Ni-C-N NSs                                    | 60.9                      | 32                                  | 10                                           | 6.67/200                     | 11           |
| NiFeS-1/NF                                    | 269                       | 69                                  | 10                                           | 0.052/180                    | 12           |
| NiFe-1/NF                                     | 180                       | 53                                  | 10                                           | 0.021/180                    | 12           |
| Ni <sub>3</sub> S <sub>2</sub> /NF            | 69                        | 39                                  | 10                                           | 0.0067/180                   | 12           |
| Ni-doped graphene                             | 50                        | 45                                  | 10                                           | 0.8/300                      | 13           |
| Ru SAs@PN                                     | 41/71                     | 38                                  | 20/50                                        | 1.67/25                      | 14           |
| Mo-SAC                                        | 132                       | 68                                  | 10                                           | 0.148/50                     | 15           |
| Pt SAS/AG                                     | 12                        | 29.33                               | 10                                           | 0.325/12                     | 16           |
| Mo-Co <sub>9</sub> S <sub>8</sub> @C          | 98                        | 90.3                                | 10                                           | 0.5/98                       | 17           |
| Ni <sub>5</sub> P <sub>4</sub> NPs            | 49                        | 98                                  | 10                                           | 0.063/100                    | 18           |
| P-doped Mo <sub>2</sub> C@C                   | 47                        | 71                                  | 10                                           | 0.02/100                     | 19           |

228 **Supplementary Table 6** The XPS peak position of W, Ni, S and Se for the

229 W-NiS<sub>0.5</sub>Se<sub>0.5</sub> before and after HER/OER stability.

| W: Ni ratio from EDX (at.%)            |             |
|----------------------------------------|-------------|
| W-NiS <sub>0.5</sub> Se <sub>0.5</sub> | 3.37: 96.63 |
| HER                                    | 3.11: 96.89 |
| OER                                    | 2.74: 97.26 |

230

231 **Supplementary Table 7** Comparison of the OER performances between  
 232 W-NiS<sub>0.5</sub>Se<sub>0.5</sub> in this work and other reported electrocatalysts.

| Materials                              | Overpo<br>tential<br>(mV) | Tafel<br>(mV<br>dec <sup>-1</sup> ) | Current<br>density<br>(mA cm <sup>-2</sup> ) | Scan<br>rate<br>(mV s <sup>-1</sup> ) | TOF<br>(s <sup>-1</sup> ) | Ref.         |
|----------------------------------------|---------------------------|-------------------------------------|----------------------------------------------|---------------------------------------|---------------------------|--------------|
| W-NiS <sub>0.5</sub> Se <sub>0.5</sub> | 171                       | 41                                  | 10                                           | 5                                     | 0.052/150<br>1.85/250     | This<br>work |
| NiO/Co <sub>3</sub> O <sub>4</sub> @NC | 240                       | 73                                  | 10                                           | 5                                     | 0.49/350                  | 20           |
| CoFeWO <sub>x</sub>                    | 231                       | 32                                  | 10                                           | 5                                     | 0.54/300                  | 21           |
| CoFeWO <sub>x</sub> -R                 | 249                       | 38                                  | 10                                           | 5                                     | 0.28/300                  | 21           |
| CoFeO <sub>x</sub>                     | 303                       | 47                                  | 10                                           | 5                                     | 0.014/300                 | 21           |
| CoO <sub>x</sub>                       | 342                       | 57                                  | 10                                           | 5                                     | 0.0031/300                | 21           |
| CoFeWO <sub>x</sub> -A                 | 332                       | 64                                  | 10                                           | 5                                     | 0.021/300                 | 21           |
| RuO <sub>x</sub>                       | 324                       | 70                                  | 10                                           | 5                                     | 0.011/300                 | 21           |
| NiFeS-1/NF                             | 230                       | 55                                  | 10                                           | 5                                     | 0.52/320                  | 12           |
| NiFe-1/NF                              | 370                       | 74                                  | 10                                           | 5                                     | 0.38/320                  | 12           |
| Ni <sub>3</sub> S <sub>2</sub> /NF     | 400                       | 97                                  | 10                                           | 5                                     | 0.035/320                 | 12           |
| Gd-CoB                                 | 230                       | 42                                  | 10                                           | 5                                     | -                         | 22           |
| Co-Mo-P/CoNWs                          | 270                       | 60                                  | 20                                           | 5                                     | -                         | 23           |
| Ni-ZIF/Ni-B@nf                         | 234                       | 57                                  | 10                                           | 5                                     | -                         | 24           |
| Ni/NiFeMoO <sub>x</sub> /NF            | 255                       | 35                                  | 10                                           | 5                                     | -                         | 25           |
| Ir/Ni(OH) <sub>2</sub>                 | 224                       | 41                                  | 10                                           | 5                                     | -                         | 26           |

234 **Supplementary Table 8** Comparison of the water splitting performances between  
 235 W-NiS<sub>0.5</sub>Se<sub>0.5</sub> in this work and other reported electrocatalysts.

| Materials                                            | Electrolyte    | Potential<br>(V) | Current density<br>(mA cm <sup>-2</sup> ) | Ref.             |
|------------------------------------------------------|----------------|------------------|-------------------------------------------|------------------|
| <b>W-NiS<sub>0.5</sub>Se<sub>0.5</sub></b>           | <b>1 M KOH</b> | <b>1.44</b>      | <b>10</b>                                 | <b>This work</b> |
| Ni <sub>3</sub> S <sub>2</sub> /NF                   | 1 M KOH        | 1.577            | 10                                        | 27               |
| Ni@NiO/NF                                            | 1 M KOH        | 1.71             | 10                                        | 28               |
| CoS <sub>x</sub> /Ni <sub>3</sub> S <sub>2</sub> /NF | 1 M KOH        | 1.572            | 10                                        | 29               |
| NiS/NiS <sub>2</sub> /NF                             | 1 M KOH        | 1.62             | 10                                        | 30               |
| Ni-Ni <sub>0.2</sub> Mo <sub>0.8</sub> N/NF          | 1 M KOH        | 1.49             | 10                                        | 31               |
| FeCo <sub>2</sub> S <sub>4</sub> /NF                 | 1 M KOH        | 1.63             | 10                                        | 32               |
| NiSe <sub>2</sub> /NF                                | 1 M KOH        | 1.64             | 10                                        | 33               |
| MoS <sub>2</sub> -Ni <sub>3</sub> S <sub>2</sub>     | 1 M KOH        | 1.5              | 10                                        | 34               |
| NiFe-Se/C                                            | 1 M KOH        | 1.68             | 10                                        | 35               |
| NiS, NiS <sub>2</sub>                                | 1 M KOH        | 1.58             | 10                                        | 36               |



**Supplementary references:**

1. Wang, Y. *et al.* Lattice-Strain Engineering of Homogeneous NiS<sub>0.5</sub>Se<sub>0.5</sub> Core–Shell Nanostructure as a Highly Efficient and Robust Electrocatalyst for Overall Water Splitting. *Adv. Mater.* **32**, 1–10 (2020).
2. Zhou, S. *et al.* Engineering electrocatalytic activity in nanosized perovskite cobaltite through surface spin-state transition. *Nat. Commun.* **7**, 1–7 (2016).
3. Chen, S. *et al.* Delocalized Spin States in 2D Atomic Layers Realizing Enhanced Electrocatalytic Oxygen Evolution. *Adv. Mater.* **29**, 1–8 (2017).
4. Yin, J. *et al.* Atomic Arrangement in Metal-Doped NiS<sub>2</sub> Boosts the Hydrogen Evolution Reaction in Alkaline Media. *Angew. Chemie. Int. Ed.* **58**, 18676–18682 (2019).
5. Xiao, Y. *et al.* Bimetallic thin film NiCo–NiCoO<sub>2</sub>@NC as a superior bifunctional electrocatalyst for overall water splitting in alkaline media. *J. Mater. Chem. A* **5**, 15901–15912 (2017).
6. Zheng, Y. *et al.* High electrocatalytic hydrogen evolution activity of an anomalous ruthenium catalyst. *J. Am. Chem. Soc.* **138**, 16174–16181 (2016).
7. Fei, H. *et al.* Microwave-Assisted Rapid Synthesis of Graphene-Supported Single Atomic Metals. *Adv. Mater.* **30**, 1–8 (2018).
8. Fei, H. *et al.* Atomic cobalt on nitrogen-doped graphene for hydrogen generation. *Nat. Commun.* **6**, 1–8 (2015).
9. Chen, W. *et al.* Rational Design of Single Molybdenum Atoms Anchored on N-Doped Carbon for Effective Hydrogen Evolution Reaction. *Angew. Chemie -*

- 259 *Int. Ed.* **56**, 16086–16090 (2017).
- 260 10. Sun, T. *et al.* Single-atomic cobalt sites embedded in hierarchically ordered porous  
261 nitrogen-doped carbon as a superior bifunctional electrocatalyst. *Proc. Natl.*  
262 *Acad. Sci. U. S. A.* **115**, 12692–12697 (2018).
- 263 11. Yin, J. *et al.* Ni–C–N Nanosheets as Catalyst for Hydrogen Evolution Reaction. *J.*  
264 *Am. Chem. Soc.* **138**, 14546–14549, (2016).
- 265 12. Ganesan, P., Sivanantham, A. & Shanmugam, S. Inexpensive electrochemical  
266 synthesis of nickel iron sulphides on nickel foam: Super active and ultra-durable  
267 electrocatalysts for alkaline electrolyte membrane water electrolysis. *J. Mater.*  
268 *Chem. A* **4**, 16394–16402 (2016).
- 269 13. Qiu, H. J. *et al.* Nanoporous Graphene with Single-Atom Nickel Dopants: An  
270 Efficient and Stable Catalyst for Electrochemical Hydrogen Production. *Angew.*  
271 *Chemie. Int. Ed.* **54**, 14031–14035 (2015).
- 272 14. Yang, J. *et al.* Efficient and Robust Hydrogen Evolution: Phosphorus Nitride  
273 Imide Nanotubes as Supports for Anchoring Single Ruthenium Sites. *Angew.*  
274 *Chemie. Int. Ed.* **130**, 9639–9644 (2018).
- 275 15. Chen, W. *et al.* Rational Design of Single Molybdenum Atoms Anchored on  
276 N-Doped Carbon for Effective Hydrogen Evolution Reaction. *Angew. Chemie.*  
277 *Int. Ed.* **56**, 16086–16090 (2017).
- 278 16. Ye, S. *et al.* Highly stable single Pt atomic sites anchored on aniline-stacked  
279 graphene for hydrogen evolution reaction. *Energy Environ. Sci.* **12**, 1000–1007  
280 (2019).

- 281 17. Wang, L. *et al.* Atomically Dispersed Mo Supported on Metallic Co<sub>9</sub>S<sub>8</sub>  
282 Nanoflakes as an Advanced Noble-Metal-Free Bifunctional Water Splitting  
283 Catalyst Working in Universal pH Conditions. *Adv. Energy Mater.* **10**, (2020).
- 284 18. Laursen, A. B. *et al.* Nanocrystalline Ni<sub>5</sub>P<sub>4</sub>: A hydrogen evolution electrocatalyst  
285 of exceptional efficiency in both alkaline and acidic media. *Energy Environ. Sci.*  
286 **8**, 1027–1034 (2015).
- 287 19. Chen, Y. Y. *et al.* Pomegranate-like N, P-Doped Mo<sub>2</sub>C@C Nanospheres as Highly  
288 Active Electrocatalysts for Alkaline Hydrogen Evolution. *ACS Nano* **10**,  
289 8851–8860 (2016).
- 290 20. Tahir, M. *et al.* High-Valence-State NiO/Co<sub>3</sub>O<sub>4</sub> Nanoparticles on Nitrogen-Doped  
291 Carbon for Oxygen Evolution at Low Overpotential. *ACS Energy Lett.* **2**,  
292 2177–2182 (2017).
- 293 21. Chen, J. *et al.* Octahedral Coordinated Trivalent Cobalt Enriched Multimetal  
294 Oxygen-Evolution Catalysts. *Adv. Energy Mater.* **10**, 1–11 (2020).
- 295 22. Haq, u. T., Mansour, S. A., Munir, A. & Haik, Y. Gold-Supported Gadolinium  
296 Doped CoB Amorphous Sheet: A New Benchmark Electrocatalyst for Water  
297 Oxidation with High Turnover Frequency. *Adv. Funct. Mater.* **30**, 1–11 (2020).
- 298 23. Hoa, V. H. *et al.* Molybdenum and Phosphorous Dual Doping in Cobalt  
299 Monolayer Interfacial Assembled Cobalt Nanowires for Efficient Overall Water  
300 Splitting. *Adv. Funct. Mater.* **30**, 1–12 (2020).
- 301 24. Xu, H. *et al.* Boronization-Induced Ultrathin 2D Nanosheets with Abundant  
302 Crystalline–Amorphous Phase Boundary Supported on Nickel Foam toward

- 303        Efficient Water Splitting. *Adv. Energy Mater.* **10**, (2020).
- 304    25. Li, Y. K. *et al.* Amorphous Ni–Fe–Mo Suboxides Coupled with Ni Network as  
305        Porous Nanoplate Array on Nickel Foam: A Highly Efficient and Durable  
306        Bifunctional Electrode for Overall Water Splitting. *Adv. Sci.* **7**, (2020).
- 307    26. Zhao, G. *et al.* An Ir/Ni(OH)<sub>2</sub> Heterostructured Electrocatalyst for the Oxygen  
308        Evolution Reaction: Breaking the Scaling Relation, Stabilizing Iridium(V), and  
309        Beyond. *Adv. Mater.* **32**, 1–9 (2020).
- 310    27. Zhang, J. *et al.* 3D Coral-Like Ni<sub>3</sub>S<sub>2</sub> on Ni Foam as a Bifunctional  
311        Electrocatalyst for Overall Water Splitting. *ACS Appl. Mater. Interfaces* **10**,  
312        31330–31339 (2018).
- 313    28. Shit, S. *et al.* Cobalt Sulfide/Nickel Sulfide Heterostructure Directly Grown on  
314        Nickel Foam: An Efficient and Durable Electrocatalyst for Overall Water  
315        Splitting Application. *ACS Appl. Mater. Interfaces* **10**, 27712–27722 (2018).
- 316    29. Sun, H. *et al.* Ni@NiO Nanowires on Nickel Foam Prepared via “Acid Hungry”  
317        Strategy: High Supercapacitor Performance and Robust Electrocatalysts for  
318        Water Splitting Reaction. *Small* **14**, 1–12 (2018).
- 319    30. Li, Q. *et al.* Construction of amorphous interface in an interwoven NiS/NiS<sub>2</sub>  
320        structure for enhanced overall water splitting. *J. Mater. Chem. A* **6**, 8233–8237  
321        (2018).
- 322    31. Jia, J. *et al.* Nickel Molybdenum Nitride Nanorods Grown on Ni Foam as  
323        Efficient and Stable Bifunctional Electrocatalysts for Overall Water Splitting.  
324        *ACS Appl. Mater. Interfaces* **10**, 30400–30408 (2018).

- 325 32. Hu, J. *et al.* FeCo<sub>2</sub>S<sub>4</sub> Nanosheet Arrays Supported on Ni Foam: An Efficient and  
326 Durable Bifunctional Electrocatalyst for Overall Water-Splitting. *ACS Sustain.*  
327 *Chem. Eng.* **6**, 11724–11733 (2018).
- 328 33. Zhang, J. *et al.* Self-Supported Porous NiSe<sub>2</sub> Nanowrinkles as Efficient  
329 Bifunctional Electrocatalysts for Overall Water Splitting. *ACS Sustain. Chem.*  
330 *Eng.* **6**, 2231–2239 (2018).
- 331 34. Yang, Y. Q. *et al.* MoS<sub>2</sub>-Ni<sub>3</sub>S<sub>2</sub> Heteronanorods as Efficient and Stable Bifunctional  
332 Electrocatalysts for Overall Water Splitting. *ACS Catal.* **7**, 2357–2366 (2017).
- 333 35. Xu, B. *et al.* Direct selenylation of mixed Ni/Fe metal-organic frameworks to  
334 NiFe-Se/C nanorods for overall water splitting. *J. Power Sources* **366**, 193–199  
335 (2017).
- 336 36. Luo, P. *et al.* Targeted synthesis of unique nickel sulfide (NiS, NiS<sub>2</sub>)  
337 microarchitectures and the applications for the enhanced water splitting system.  
338 *ACS Appl. Mater. Interfaces* **9**, 2500–2508 (2017).
